# Supplementary material for: Controllable growth of three-dimensional CdS nanoparticles on TiO2nanotubes to enhance photocatalytic activity
Source: Royal Society of Chemistry journal article supplement (doi:10.1039/c9ra10895e), 2020-01-01
Supplement: c9ra10895e1.pdf [file c9ra10895e1.pdf]

## Controllable growth of three-dimensional CdS nanoparticles on TiO<sub>2</sub>

### nanotubes to enhance photocatalytic activity

Guo-Min Liu,<sup>a</sup> Wen-Yuan Jia,<sup>a</sup> Qiu-Shi Jiang,<sup>b</sup> Zhi-Qiang Cheng,<sup>\*b</sup>

<sup>a</sup>Department of Orthopedics, the Second Hospital of Jilin University, Changchun 130000, China;

<sup>b</sup>College of Resources and Environment, Jilin Agriculture University, Changchun 130118, China.

\*Corresponding Author

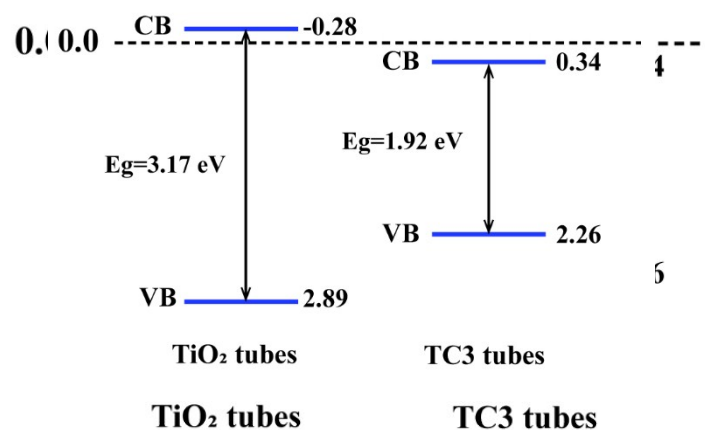

Fig.S1 Calculated band edge (VB, CB) position of TiO<sub>2</sub> tubes and TC3 tubes.

Fig. S1 shows the band edge of the samples TiO<sub>2</sub> tubes and TC3 tubes. The empirical formula for the edge calculation of semiconductors is:

$$E_{CB} = X - E_e - 0.5Eg$$

$$E_{VB} = E_{CB} + Eg$$

$E_{CB}$  is the CB edge potential, and  $X$  is the electronegativity of the semiconductor, which is the arithmetic mean of the electronegativity of constituent atoms and first ionization energy.  $E_e$  is the energy of free electrons on the hydrogen scale (approximately 4.5 eV). The  $Eg$  values of TiO<sub>2</sub> tubes and TC3 tubes are 3.17 eV and 1.92 eV. The band edge position (VB, CB) of TiO<sub>2</sub> and TC3 were 2.89 eV and -0.28 eV, 2.26 eV and 0.34 eV.
